# Supplementary material
Source: publisher figshare collection journal article supplement (https://gsapubs.figshare.com/ndownloader/files/23306801)
Supplement: Supplementary file 1 [file 23306801]

Leydet et al., 2018, Opening of glacial Lake Agassiz's eastern outlets by the start of the Younger Dryas cold period: *Geology*, <https://doi.org/10.1130/G39501.1>.

## **METHODS**

**Geomorphic setting and field methods.** The overall study area encompasses the region surrounding Thunder Bay, Ontario. Four sites were selected based on work that previously defined the eastern outlet channels of the glacial Lake Agassiz drainage basin based on paleotopography and channel presence (Teller et al., 2005; Breckenridge, 2015). We sampled boulders from topographically stable positions on bedrock highs around the North Lake channel, Flatrock Lake channel, and Lake Kaministiquia (Kam) channels (Fig. 2). The Lake Kam region encompasses several sub-outlets that all route through our sampling area (Fig. 2). The Steep Rock moraine separates the North Lake and Flatrock Lake channels; The Brule moraine separates the Flatrock Lake channel from the Lake Kam channels (Fig. 2). We also sampled south of Lake Nipigon behind the Marks moraine (Fig. 2). We purposely sampled on bedrock highs located above outlet channels to avoid areas that may have been disturbed by meltwater. In the case of Lake Kam, we made sure to sample above this proglacial lake that formed at the end of the Younger Dryas when the Laurentide ice sheet deposited the Marks moraine blocking eastward Lake Agassiz basin routing into Lake Superior (Lowell et al., 1999; Teller et al., 2005; Breckenridge, 2015). Our sample locations on bedrock highs minimize possible exhumation of boulders from sediment that can occur on moraines, which would reduce the deglaciation age. By sampling high points on the terrain, we also reduce the potential for snow cover affecting *in situ* cosmogenic nuclide production, because the areas are windswept (Gosse and Phillips, 2001). Boulder samples have no topographic shielding. Two to four kg of sample were removed using a

hammer and chisel on the top surface of the boulder. Latitude, longitude, and elevation were recorded for each sample (Table DR1).

**Sample processing and analytical techniques.** All samples were prepared at Oregon State University's Cosmogenic Nuclide Laboratory. In order to physically isolate quartz, bulk rock samples were crushed, pulverized, and sieved down to a 250-500  $\mu\text{m}$  fraction. Physical separation continued with magnetic separation of magnetic and non-magnetic minerals. Chemical separation of quartz was performed by frothing the sample using a laurel amine, compressed  $\text{CO}_2$ , and deionized water solution, followed by etching in dilute  $\text{HF}/\text{HNO}_3$ . Quartz purity was tested at the University of Colorado-Boulder. A known concentration and amount of the low- $^{10}\text{Be}$  OSU-Blue Be carrier was added to each sample (Murray et al., 2012). Samples were converted to BeO through dissolution, anion and cation exchange, precipitation, and oxidizing steps.  $^{10}\text{Be}/^9\text{Be}$  ratios were measured by accelerator mass spectrometry (AMS) at Purdue University's Rare Isotope Measurement Laboratory (PRIME) against the 07KNSTD standard. Blanks averaged  $\sim 1.17 \times 10^{-15} \text{ }^{10}\text{Be}/^9\text{Be}$  ( $n=4$ ).

**Exposure age calculation.** Following Cuzzzone et al. (2016) and Ullman et al. (2016), we quantify the time-varying effects of uplift and atmospheric pressure on the  $^{10}\text{Be}$  production rates since exposure of our sites. We apply an isostatic surface loading model (Mitrovica et al., 1994) that includes the influence of ice loading, using the ICE-5G reconstruction of ice thickness and its partnering Earth viscosity model, VM2 (Peltier, 2004), ocean loading (Mitrovica and Milne, 2003) and variations in Earth rotation (Mitrovica et al., 2005) to estimate changes in altitude for each site. This approach explicitly estimates the true vertical land motion, without the confounding effects of global-mean sea-level rise and the gravitational attraction of the remaining ice sheets.

We use output from an atmospheric-ocean general circulation model providing simulated climate at 3 ka time slices from 21 ka to 0 ka (Alder and Hostetler, 2015) to determine the changes in atmospheric pressure (Stone, 2000; Staiger et al., 2007). We linearly interpolate this output between simulations to estimate the change in atmospheric thickness due to the change in surface air pressure using the hypsometric equation (Cuzzzone et al., 2016; Ullman et al., 2016). Through this method, we determine the elevation correction for our sites that range from 6 m to 15 m. While opposing the uplift correction in direction, this small atmospheric correction does not offset the uplift correction in magnitude. In addition, the atmospheric correction is within the accuracy of our site measurement of altitude. Therefore, we exclude the atmospheric correction in our overall sample correction and only account for the topographic uplift in our age estimates.

Sample ages were calculated using the CRONUS-Earth Calculator version 2.2 with the Northeast North America (NENA) production rate (Balco et al., 2009) (Table DR1); we use this version as it allows the use of a regional production rate from close to our study area (later versions do not allow the use of regional production rate calibrations). Note that this production rate does not include an uplift or atmospheric correction. Similar to our findings, Balco et al. (2009) deemed atmospheric changes to be minimal following Staiger et al. (2007). Balco et al. (2009) also calculated the effect of including uplift on the production rate in the same manner as we have for our samples and found its effect to be 1.5-2.5%, which is within the uncertainty of the production rate. As such, this uncorrected-production rate is applicable to our uplift-corrected samples. The reason for the difference in uplift effects is that our sample sites are from the interior of the Laurentide ice sheet whereas the production-rate sites are from near the Laurentide ice-sheet maximum margin along the eastern seaboard of North America where ice was significantly thinner and covered the sites for a shorter period of time. Several studies have

shown the NENA production rate to be applicable to our sites where independent age control is available. Ullman et al. (2016) dated the Sakami Moraine in western Quebec that formed upon the opening of Hudson Bay. Only using the NENA production rate with the uplift correction for the Sakami samples does the moraine  $^{10}\text{Be}$  age agree with the independent constraints on the moraine age of  $\sim 8.2$  ka (Hillaire-Marcel et al., 1981; Barber et al., 1999). Likewise,  $^{14}\text{C}$  age constraints on a Tiedemann Glacier moraine in British Columbia agree with  $^{10}\text{Be}$  ages from the moraine using the NENA production rate (Menounos et al., 2013). Thus, the NENA production rate is applicable to our study region that lies in southern Canada between these two independent confirmation sites.

We analyze our data based on the Lal/Stone time-dependent scheme along with the internal uncertainty (Table DR1). Uncertainty in the production rate is 4.8% (Balco et al., 2009). Utilizing other scaling schemes (Balco et al., 2009) or production rates (Lifton et al., 2015) does not alter our conclusions as the ages are within the internal uncertainty of our reported ages (Table DR2).

**Removal of outliers and calculation of site averages.** We find six outliers (with a potential seventh – see text) out of our 23 samples (Fig. DR1). North Lake's outlier ( $n=1$ ) is a young age (NL-4-15) that disagrees with the minimum-limiting  $^{14}\text{C}$  age of deglaciation of  $12.5 \pm 0.1$  ka (Lowell et al., 2009). This sample was also the smallest boulder we sampled. We interpret this young age as reflecting post-depositional movement or exhumation from a thin till cover that used to rest on the bedrock. Flatrock Lake has two samples that are younger than the minimum-limiting  $^{14}\text{C}$  age of deglaciation of  $12.3 \pm 0.2$  ka (Lowell et al., 2009), also reflecting potential exhumation. The Lake Kam outliers ( $n=2$ ) are either too old or too young based on the most basic understanding of Laurentide ice-sheet deglaciation in this region (Teller et al., 2005,

Lowell et al., 2009; Breckenridge, 2015). Specifically, the old age is out of stratigraphic order with even the North Lake ages and may contain inheritance. The young age disagrees with the minimum-limiting  $^{14}\text{C}$  age of deglaciation of  $12.0 \pm 0.2$  ka (Lowell et al., 2009) and thus may have been exhumed following deposition. In addition, these two ages are statistical outliers based on Grubb's criteria for testing outliers from a normally distributed population (Komsta, 2011);  $p=0.007827$ . There is a third potential young outlier, who's inclusion or exclusion does not affect our conclusions (see text). Our site behind the Marks moraine has one old outlier that is out of stratigraphic order with retreat from the Marks moraine post-dating the end of the Younger Dryas (Teller et al., 2005), suggesting that it contains some inheritance. Inclusion of the one old sample results in a mean of  $11.7 \pm 0.5$  ka, which does not change our conclusions. We calculated an arithmetic mean and standard error for each of our study sites as the best estimate for the timing of Laurentide ice-sheet retreat from the outlet (Bevington and Robinson, 2002). We use the standard error of the mean as this is a more conservative assessment our sample uncertainty; the uncertainty from an error-weighted mean (the mean is the same by either approaches) is less than the approach we use. In Figure DR2, we test our removal of outliers with quantile-quantile plots (Ullman et al., 2016) to show the normality of the final samples used to calculate the mean and its uncertainty.

## REFERENCES CITED

Alder, J.R., and Hostetler, S.W., 2015, Global climate simulations at 3000-yr intervals for the last 21,000 years with the GENMOM coupled atmosphere-ocean model: *Climate of the Past*, v. 11, p. 449-171.

111 Balco, G., Briner, J., Finkel, R.C., Rayburn, J.A., Ridge, J.C., and Schaefer, J.M., 2009, Regional  
 112 beryllium-10 production rate calibration for northeastern North America: Quaternary  
 113 Geochronology, v. 4, p. 93-107.

114 Barber, D.C., Dyke, A., Hillaire-Marcel, C., Jennings, A.E., Andrews, J.T., Kerwin, M.W.,  
 115 Bilodeau, G., McNeely, R., Southon, J., Morehead, M.D., and Gagnon, J.-M., 1999, Forcing  
 116 of the cold event of 8,200 years ago by catastrophic drainage of Laurentide lakes: Nature, v.  
 117 400, p. 344-348.

118 Bevington, P., and Robinson, D.K., 2002, Data Reduction and Error Analysis for the Physical  
 119 Sciences, 3<sup>rd</sup> Ed.: McGraw-Hill, 336 pp.

120 Breckenridge, A., 2015, The Tintah-Campbell gap and implications for glacial Lake Agassiz  
 121 drainage during the Younger Dryas cold interval: Quaternary Science Reviews, v. 117, p.  
 122 124-134.

123 Cuzzone, J.K., Clark, P.U., Carlson, A.E., Ullman, D.J., Rinterknecht, V.R., Milne, G.A., Pekka,  
 124 J., Wohlfarth, B., Marcott, S.A., and Caffee, M., 2016, Final deglaciation of the Scandinavian  
 125 Ice Sheet and implications for the Holocene global sea-level budget: Earth and Planetary  
 126 Science Letters, v. 448, p. 34-41.

127 Gosse, J.C., and Phillips, F.M., 2001, Terrestrial in situ cosmogenic nuclides: theory and  
 128 application: Quaternary Science Reviews, v. 20, p. 1475-1560.

129 Hillaire-Marcel, C., Occhietti, S., and Vincent, J.-S., 1981, Sakami moraine, Quebec: A 500-km-  
 130 long moraine without climatic control: Geology, v. 9, p. 210-214.

131 Komsta, L., 2011, Outliers: Tests for outliers: R package version 0.14, [https://CRAN.R-](https://CRAN.R-project.org/package=outliers)  
 132 [project.org/package=outliers](https://CRAN.R-project.org/package=outliers).

133 Lifton, N., Caffee, M., Finkel, R., Marrero, S., Nishiizumi, K., Phillips, F.M., Goehring, B.,

134 Gosse, J., Stone, J., Schaefer, J., Theriault, B., Jull, A.J.T., and Fifield, K., 2015, In situ  
 135 cosmogenic nuclide production rate calibration for the CRONUS-Earth project from Lake  
 136 Bonneville, Utah, shoreline features: *Quaternary Geochronology*, v. 26, p. 56-69.

137 Lowell T.V., Fisher, T.G., Hajdas, I., Glover, K., Loope, H., and Henry, T., 2009, Radiocarbon  
 138 deglaciation chronology of the Thunder Bay, Ontario area and implications for ice sheet  
 139 retreat patterns: *Quaternary Science Reviews*, v. 28, p. 1597-1607.

140 Lowell T.V., Larson G.J., Hughes J.D., and Denton G.H., 1999, Age verification of the Lake  
 141 Gribben forest bed and the Younger Dryas advance of the Laurentide Ice Sheet: *Canadian*  
 142 *Journal of Earth Science*, v. 36, p. 383-393.

143 Menounos B., Clague, J.J., Clarke, G.K.C., Marcott, S.A., Osborn, G., Clark, P.U., Tennant, C.,  
 144 and Novak, A.M., 2013, Did rock avalanche deposits modulate the late Holocene advance of  
 145 Tiedemann Glacier, southern Coast Mountains, British Columbia, Canada?: *Earth and*  
 146 *Planetary Science Letters*, v. 384, p. 154-164.

147 Mitrovica, J.X., and Milne, G.A., 2003, On post-glacial sea level: I General theory: *Geophysical*  
 148 *Journal International*: v. 154, p. 253-267.

149 Mitrovica, J.X., Davis, J.L., and Shapiro, I.I., 1994, A Spectral Formalism for Computing 3-  
 150 Dimensial Deformations Due to Surface Loads: 1. Theory: *Journal of Geophysical Research*,  
 151 v. 99, p. 7057-7073.

152 Mitrovica, J.X., Wahr, J., Matsuyama, I., and Paulson, A., 2005, The rotational stability of the  
 153 ice-age earth: *Geophysical Journal International*, v. 161, p. 491-506.

154 Murray, D.S., Carlson, A.E., Singer, B.S., Anslow, F.S., He, F., Caffee, M., Marcott, S.A., Liu,  
 155 Z., and Otto-Bliesner, B.L., 2012, Northern Hemisphere forcing of the last deglaciation in  
 156 southern Patagonia: *Geology*, v. 40, p. 631-634.

157 Peltier, W.R., 2004, Global glacial isostasy and the surface of the ice-age earth: The ICE-5G  
158 (VM2) model and GRACE: Annual Review of Earth and Planetary Sciences, v. 32, p. 111-  
159 149.

160 Rasmussen, S.O., Andersen, K.K., Svensson, A.M., Steffensen, J.P., Vinther, B.M., Clausen,  
161 H.B., Siggaard-Andersen, M.-L., Johnsen, S.J., Larsen, L.B., Dahl-Jensen, D., Bigler, M.,  
162 Röthlisberger, Fischer, H., Goto-Azuma, K., Hansson, M.E., and Ruth, U., 2006, A new  
163 Greenland ice core chronology for the last glacial termination: Journal of Geophysical  
164 Research, v. 111, doi: 10.1029/2005JD006079.

165 Staiger, J., Gosse, J., Toracinta, R., Oglesby, B., Fastook, J., and Johnson, J.V., 2007,  
166 Atmospheric scaling of cosmogenic nuclide production: Climate effect: Journal of  
167 Geophysical Research, v. 112, doi: 10.1029/2005JB003811.

168 Stone, J.O., 2000, Air pressure and cosmogenic isotope production. Journal of Geophysical  
169 Research, v. 105, p. 23,753-23,759.

170 Teller, J. T., Boyd, M., Yang, Z., Kor, P.S.G., and Fard, A.M., 2005, Alternative routing of Lake  
171 Agassiz overflow during the Younger Dryas: new dates, paleotopography, and a re-  
172 evaluation: Quaternary Science Reviews, v. 24, p. 1890-1905.

173 Ullman, D.J., Carlson, A.E., Hostetler, S.W., Clark, P.U., Cuzzone, J.K., Milne, G.A., Winsor,  
174 K., and Caffee, M., 2016, Final deglaciation of the Laurentide ice sheet in the early to middle  
175 Holocene: Quaternary Science Review, v. 152, p. 49-59.



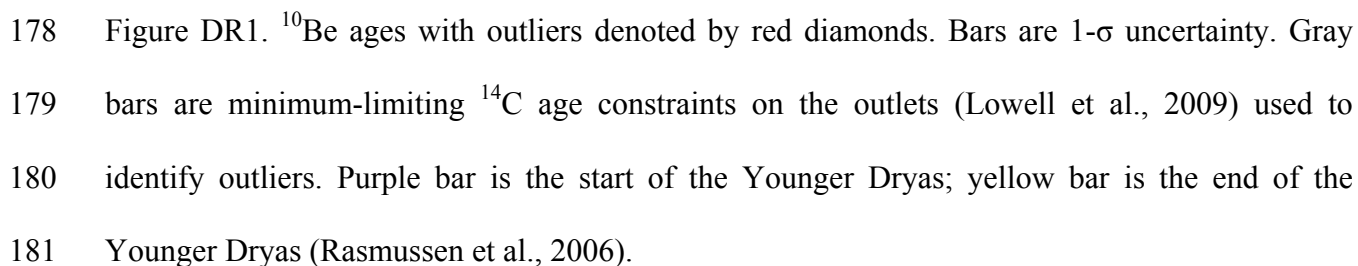

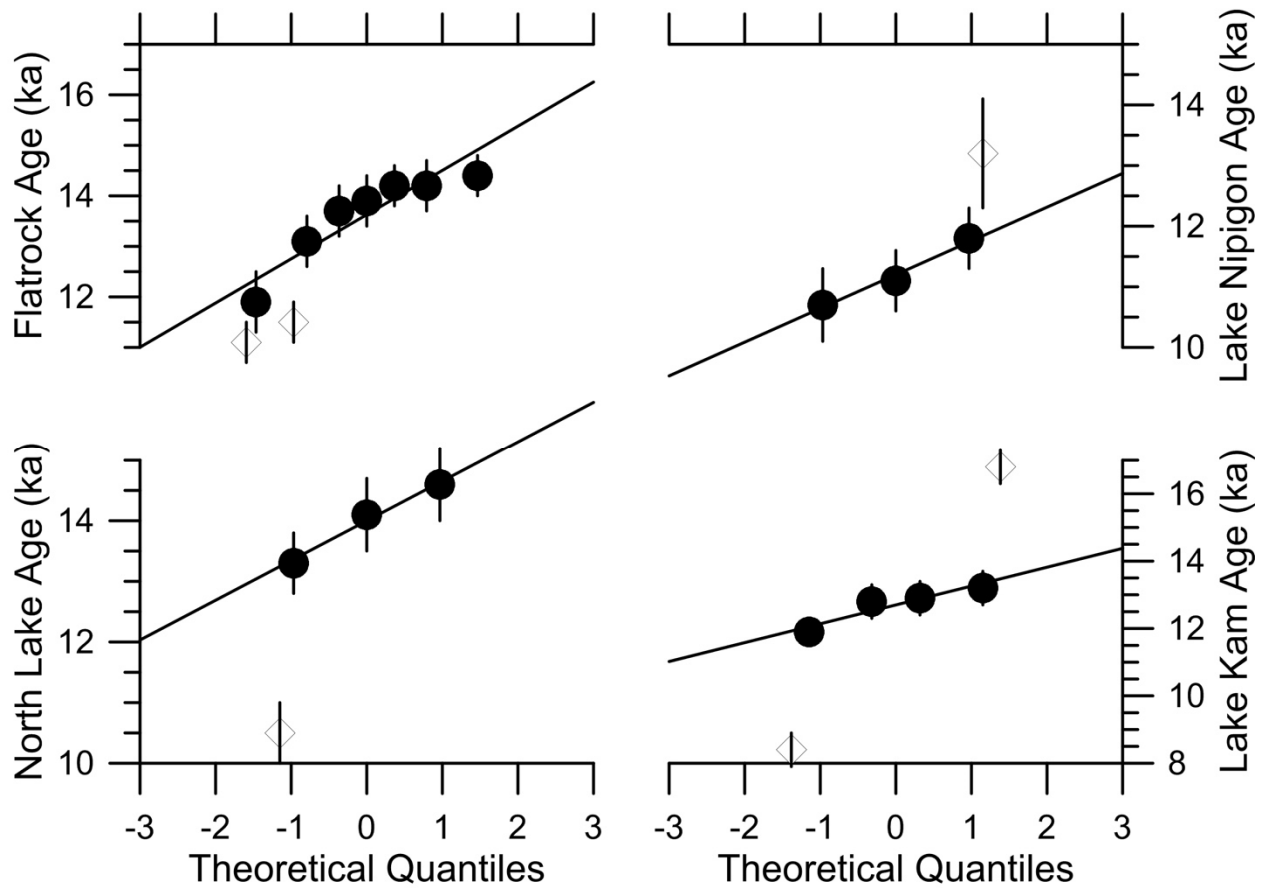

Figure DR2. Exposure age versus theoretical quantile for each of the sample groupings (Ullman et al., 2016). This modified version of a Quantile-Quantile plot includes the internal uncertainty for each of the dates. The black line on each plot shows the expected result for a normal distribution (scaled with the mean and standard deviation of each sample grouping). Solid circles are the ages used to calculate the mean; open diamonds are the excluded outlier samples.

**Table DR1. Cosmogenic Surface Exposure Ages for the Eastern Outlets by sample site**

| Sample                      | Latitude | Longitude | Modern<br>Elevation<br>(m asl) | Corrected<br>Elevation<br>(m) <sup>d</sup> | Thickness<br>(cm) | Quartz (g) | <sup>9</sup> Be Mass<br>added (g) | <sup>10</sup> Be/ <sup>9</sup> Be<br>ratio (10 <sup>-15</sup> ) | Internal<br>Uncertainty<br>(10 <sup>-15</sup> ) | <sup>10</sup> Be (atoms<br>g <sup>-1</sup> ) <sup>e</sup> | Uncertainty<br>(atoms g <sup>-1</sup> ) | <sup>10</sup> Be age<br>(ka) <sup>b, c</sup> |
|-----------------------------|----------|-----------|--------------------------------|--------------------------------------------|-------------------|------------|-----------------------------------|-----------------------------------------------------------------|-------------------------------------------------|-----------------------------------------------------------|-----------------------------------------|----------------------------------------------|
| <b>North Lake Site</b>      |          |           |                                |                                            |                   |            |                                   |                                                                 |                                                 |                                                           |                                         |                                              |
| NL-1-15                     | 48.046   | -90.045   | 517                            | 455                                        | 3.5               | 44.1627    | 0.8751                            | 185.14                                                          | 6.33                                            | 87455                                                     | 3318                                    | 14.6 ± 0.6                                   |
| NL-3-15                     | 48.052   | -90.047   | 475                            | 413                                        | 4                 | 44.8610    | 0.8746                            | 164.02                                                          | 5.94                                            | 76499                                                     | 3079                                    | 13.3 ± 0.5                                   |
| NL-4-15*                    | 48.056   | -90.054   | 466                            | 404                                        | 2                 | 50.3218    | 0.8784                            | 145.55                                                          | 6.03                                            | 60778                                                     | 2798                                    | 10.5 ± 0.5                                   |
| NL-5-15                     | 48.056   | -90.054   | 462                            | 400                                        | 2                 | 43.6625    | 0.8729                            | 171.69                                                          | 6.83                                            | 81799                                                     | 3612                                    | 14.1 ± 0.6                                   |
| Site Mean Age <sup>a</sup>  |          |           |                                |                                            |                   |            |                                   |                                                                 |                                                 |                                                           |                                         | <b>14.0 ± 0.4</b>                            |
| <b>Flat Rock Site</b>       |          |           |                                |                                            |                   |            |                                   |                                                                 |                                                 |                                                           |                                         |                                              |
| FR-1-15                     | 48.293   | -90.266   | 490                            | 424                                        | 3                 | 40.0132    | 0.8736                            | 159.91                                                          | 4.33                                            | 83181                                                     | 2504                                    | 14.2 ± 0.4                                   |
| FR-2-15                     | 48.293   | -90.266   | 490                            | 424                                        | 2.5               | 37.6572    | 0.8780                            | 148.53                                                          | 4.79                                            | 82192                                                     | 2975                                    | 13.9 ± 0.5                                   |
| FR-4-15*                    | 48.292   | -90.265   | 492                            | 426                                        | 2.5               | 35.3228    | 0.8743                            | 112.23                                                          | 3.86                                            | 65761                                                     | 2554                                    | 11.1 ± 0.4                                   |
| FR-5-15*                    | 48.291   | -90.266   | 495                            | 429                                        | 2                 | 51.6664    | 0.8748                            | 170.14                                                          | 4.99                                            | 68653                                                     | 2238                                    | 11.5 ± 0.4                                   |
| FR-6-15                     | 48.291   | -90.266   | 496                            | 430                                        | 3                 | 53.7861    | 0.8720                            | 218.32                                                          | 7.39                                            | 83877                                                     | 3184                                    | 14.2 ± 0.5                                   |
| FR-7-15                     | 48.291   | -90.266   | 498                            | 432                                        | 2                 | 35.3071    | 0.8663                            | 122.41                                                          | 5.68                                            | 70636                                                     | 3718                                    | 11.9 ± 0.6                                   |
| FR-8-15                     | 48.285   | -90.265   | 511                            | 445                                        | 2                 | 46.8733    | 0.8775                            | 177.16                                                          | 6.29                                            | 78818                                                     | 3130                                    | 13.1 ± 0.5                                   |
| FR-9-15                     | 48.284   | -90.265   | 512                            | 446                                        | 1.5               | 35.8776    | 0.8714                            | 143.63                                                          | 4.99                                            | 83076                                                     | 3212                                    | 13.7 ± 0.5                                   |
| FR-11-15                    | 48.284   | -90.265   | 506                            | 440                                        | 1                 | 59.3766    | 0.8677                            | 250.66                                                          | 6.79                                            | 86909                                                     | 2641                                    | 14.4 ± 0.4                                   |
| Site Mean Age <sup>a</sup>  |          |           |                                |                                            |                   |            |                                   |                                                                 |                                                 |                                                           |                                         | <b>13.6 ± 0.3</b>                            |
| <b>Lake Kam Outlet Site</b> |          |           |                                |                                            |                   |            |                                   |                                                                 |                                                 |                                                           |                                         |                                              |
| KM-1-15                     | 48.528   | -89.664   | 494                            | 426                                        | 2                 | 52.0606    | 0.8751                            | 196.62                                                          | 6.57                                            | 78592                                                     | 2931                                    | 13.2 ± 0.5                                   |
| KM-3-15*                    | 48.528   | -89.665   | 484                            | 416                                        | 3.5               | 23.2368    | 0.8788                            | 55.51                                                           | 2.86                                            | 49169                                                     | 2919                                    | 8.4 ± 0.5                                    |
| KM-4-15                     | 48.529   | -89.667   | 475                            | 407                                        | 3                 | 39.8282    | 0.8752                            | 143.21                                                          | 4.74                                            | 74941                                                     | 2756                                    | 12.9 ± 0.5                                   |
| KM-5-15                     | 48.527   | -89.665   | 487                            | 419                                        | 3                 | 52.0729    | 0.8643                            | 178.15                                                          | 5.88                                            | 69914                                                     | 2599                                    | 11.9 ± 0.4                                   |
| KM-7-15*                    | 48.527   | -89.665   | 487                            | 419                                        | 3                 | 46.9759    | 0.8801                            | 220.74                                                          | 6.63                                            | 98411                                                     | 3299                                    | 16.8 ± 0.5                                   |
| KM-9-15                     | 48.522   | -89.662   | 479                            | 411                                        | 2                 | 41.8971    | 0.8757                            | 150.69                                                          | 5.80                                            | 75022                                                     | 3210                                    | 12.8 ± 0.5                                   |
| Site Mean Age <sup>a</sup>  |          |           |                                |                                            |                   |            |                                   |                                                                 |                                                 |                                                           |                                         | <b>12.7 ± 0.3</b>                            |
| <b>Lake Nipigon Site</b>    |          |           |                                |                                            |                   |            |                                   |                                                                 |                                                 |                                                           |                                         |                                              |
| LN-8-15*                    | 48.704   | -88.627   | 280                            | 213                                        | 1                 | 47.2033    | 0.8639                            | 149.36                                                          | 8.76                                            | 65104                                                     | 4244                                    | 13.2 ± 0.9                                   |
| LN-10-15                    | 48.704   | -88.627   | 282                            | 215                                        | 2.5               | 46.6695    | 0.8688                            | 121.90                                                          | 4.52                                            | 53995                                                     | 2227                                    | 11.1 ± 0.5                                   |
| LN-11-15                    | 48.704   | -88.628   | 271                            | 204                                        | 3                 | 31.0688    | 0.8785                            | 76.08                                                           | 3.86                                            | 51464                                                     | 2915                                    | 10.7 ± 0.6                                   |
| LN-12-15                    | 48.704   | -88.628   | 271                            | 204                                        | 4                 | 46.6124    | 0.8611                            | 129.41                                                          | 4.92                                            | 56275                                                     | 2432                                    | 11.8 ± 0.5                                   |
| Site Mean Age <sup>a</sup>  |          |           |                                |                                            |                   |            |                                   |                                                                 |                                                 |                                                           |                                         | <b>11.2 ± 0.3</b>                            |

\* Denotes Outliers excluded from error weighted mean calculation

<sup>a</sup> Site mean age calculates using error weighted mean

<sup>b</sup> Lal/Stone Time Dependent scaling scheme ages presented from the CRONUS Earth online calculator v. 2.2

<sup>c</sup> Ages calculated with standard atmosphere, no shielding, density of 2.65 g cm<sup>-3</sup>, and erosion of 0

<sup>d</sup> Elevations are uplift corrected (see text)

<sup>e</sup> Be atom concentrations are blank corrected (see text)

**Table DR2. Cosmogenic Surface Exposure Ages by production rate and scaling scheme**

| Sample                      | Internal<br>Uncertainty<br>(yr) | Lifton (yr)       | External<br>Uncertainty<br>(yr) | Lal/Stone<br>(yr) | External<br>Uncertainty<br>(yr) |
|-----------------------------|---------------------------------|-------------------|---------------------------------|-------------------|---------------------------------|
| <b>North Lake Site</b>      |                                 |                   |                                 |                   |                                 |
| NL-1-15                     | 551                             | 14362             | 890                             | 14559             | 898                             |
| NL-3-15                     | 503                             | 13125             | 832                             | 13289             | 839                             |
| NL-4-15*                    | 453                             | 10349             | 695                             | 10477             | 701                             |
| NL-5-15                     | 622                             | 13966             | 921                             | 14148             | 930                             |
| Site Mean (ka)              |                                 | <b>13.8 ± 0.4</b> |                                 | <b>14.0 ± 0.4</b> |                                 |
| <b>Flat Rock Site</b>       |                                 |                   |                                 |                   |                                 |
| FR-1-15                     | 424                             | 13966             | 802                             | 14163             | 810                             |
| FR-2-15                     | 473                             | 13748             | 837                             | 13940             | 845                             |
| FR-4-15*                    | 405                             | 10994             | 687                             | 11137             | 693                             |
| FR-5-15*                    | 374                             | 11403             | 670                             | 11549             | 676                             |
| FR-6-15                     | 537                             | 14005             | 868                             | 14204             | 876                             |
| FR-7-15                     | 620                             | 11701             | 841                             | 11851             | 850                             |
| FR-8-15                     | 486                             | 12893             | 813                             | 13068             | 820                             |
| FR-9-15                     | 527                             | 13514             | 843                             | 13703             | 851                             |
| FR-11-15                    | 434                             | 14148             | 815                             | 14352             | 823                             |
| Site Mean (ka)              |                                 | <b>13.4 ± 0.3</b> |                                 | <b>13.6 ± 0.3</b> |                                 |
| <b>Lake Kam Outlet Site</b> |                                 |                   |                                 |                   |                                 |
| KM-1-15                     | 461                             | 13033             | 802                             | 13222             | 810                             |
| KM-3-15*                    | 467                             | 8292              | 638                             | 8445              | 648                             |
| KM-4-15                     | 472                             | 12751             | 781                             | 12933             | 788                             |
| KM-5-15                     | 440                             | 11773             | 723                             | 11936             | 730                             |
| KM-7-15*                    | 527                             | 16478             | 978                             | 16774             | 991                             |
| KM-9-15                     | 544                             | 12619             | 821                             | 12798             | 829                             |
| Site Mean (ka)              |                                 | <b>12.5 ± 0.3</b> |                                 | <b>12.7 ± 0.3</b> |                                 |
| <b>Lake Nipigon Site</b>    |                                 |                   |                                 |                   |                                 |
| LN-8-15*                    | 856                             | 13014             | 1062                            | 13241             | 1078                            |
| LN-10-15                    | 453                             | 10910             | 698                             | 11096             | 707                             |
| LN-11-15                    | 564                             | 10546             | 790                             | 10732             | 801                             |
| LN-12-15                    | 506                             | 11630             | 759                             | 11828             | 769                             |
| Site Mean (ka)              |                                 | <b>11.0 ± 0.3</b> |                                 | <b>11.2 ± 0.3</b> |                                 |

\* Denotes outliers not included in site mean calculations
